# Supplementary material for: What do real-world gait related digital mobility outcomes tell us about Parkinson’s disease? A systematic review of the literature
Source: Research Square preprint supplement (doi:10.21203/rs.3.rs-6276595/v1), 2025-04-23
Supplement: Supplementary file 1 [file f53692f5718c9cd9f9257c34.docx]

Supplementary materials: **What do real-world gait related digital mobility outcomes tell us about Parkinson’s disease? A systematic review of the literature**

**Table of contents:**

[**Supplementary table 1.** Search strategy applied in the systematic review. 1](#_Toc192859436)

[**Supplementary table 2.** Table of data extraction methods for the full-text review 2](#_Toc192859437)

[**Supplementary table 3.** Quality appraisal assessment 6](#_Toc192859438)

[**Supplementary table 4.** Differences identified in the measurement methods of the supervised studies 7](#_Toc192859439)

[**Supplementary table 5.** Quality assessment reported across each individual study included in this review. 8](#_Toc192859440)

**Supplementary table 1.** Search strategy applied in the systematic review.

| **String no.** | **Query** |
| --- | --- |
| #1. (Gait terms) | (((step* OR stride*) NEAR/2 (speed OR velocit* OR time* OR length* OR width* OR frequenc* OR rate* OR rhythm* OR variabilit* OR symmetr* OR asymmetr* OR count* OR number* OR distance* OR cadence*)):ti,ab) OR (((swing* OR stance* OR 'single support' OR 'double support') NEAR/2 (time* OR duration* OR variabilit* OR symmetr* OR asymmetr*)):ti,ab) OR (((spatiotemporal OR 'spatiotemporal') NEAR/2 (parameter* OR feature* OR characteristic*)):ti,ab) OR (((gait OR walk* OR ambulat*) NEAR/2 (speed OR velocit* OR time* OR cadence* OR pace* OR rhythm* OR volume* OR bout* OR duration* OR distance* OR intensit* OR variabilit* OR asymmetr* OR symmetr* OR parameter* OR feature* OR characteristic* OR assess* OR examin* OR analys* OR batter* OR measure* OR test*)) home OR domestic OR ((free OR daily) NEAR/2 living) OR ‘real -world’ OR ‘real world’ OR ‘community ambulat*’ OR (((day* OR daily OR ambulat* OR physical OR walk* OR monitor*) NEAR/2 activit*)) OR (((day* OR daily OR count* OR time OR number*) NEAR/2 (walk* OR step*)) OR ((sensor* OR record* OR monitor*) NEAR/2 (continu* OR activit* OR ‘long-term’ OR ‘long term’)) OR (Body NEAR/2 sensor*) OR Pedometer* OR *phone* OR (mobile NEAR/2 device*) :ti,ab) |
| #2 (Disease area terms) | 'Parkinson disease'/exp OR 'parkinsonism' (parkinson* OR 'paralysis agitans') |
| #3 (Final) | #1 AND #2 AND (1999:py OR 2000:py OR 2001:py OR 2002:py OR 2003:py OR 2004:py OR 2005:py OR2006:py OR 2007:py OR 2008:py OR 2009:py OR 2010:py OR 2011:py OR 2012:py OR 2013:py OR 2014:py OR 2015:py OR 2016:py OR 2017:py OR 2018 :py OR 2019:py OR 2020:py OR 2021:py) |

**Supplementary table 2.** Table of data extraction methods for the full-text review

|  | **Associated questions** |
| --- | --- |
| **Publication details** | |
| Authors and affiliations | Who conducted the research? |
| Type | In what type of literature was the study published (Journal, grey literature, conference abstract) |
| Year | When was the study published? |
| Country/region | In which geographic region(s) did the study take place? |
| **General details** | |
| Study design | What was the study’s design? |
| Study aims | What were the study’s aims? |
| Population | What population was studied? Were there any specific inclusion/exclusion criteria such as disease severity, subtype, or age? |
| Included DMOS | Which DMOs were measured? |
| **Technical details** | |
| Measurement device | How many devices were included? Which anatomical position were the device(s) worn? How were the devices attached?  Who was the device manufactured by? |
| Real-world measurement protocol | How many days were participants assessed for? Which aggregation method was applied? |
| **Assessment differences** | |
| Study setting | Were DMO quantitatively assessed during both unsupervised, continuous real-world assessment and supervised, scripted assessment in a clinic/laboratory environment, in the same study? |
| Differences in DMOs | What differences in DMOs occurred (or did not occur) between assessment condition?  Did these differences reach statistical significance? |
| **PD compared to controls** | |
| Study design | Were patients and controls matched or are the groups comparable with respect to appropriate criteria (height, age, sex)? Was gait analysis controlled for walking speed? Did the study focus on a specific subgroup or population? |
| Differences in DMOs | What differences in DMOs occurred (or did not occur) between people with PD and healthy controls? Did these differences reach statistical significance? |
| **Associations with motor severity** | |
| Analytical methods | How did the authors measure the relationship between clinically relevant measures and DMOs? What association measure was used? |
| Clinically relevant measures | What clinically relevant measures were studied? |
| Relationship strength | What was the strength of the reported relationship between the measure and the DMO? Was the association statistically significant? |
| **Associations with clinical outcomes** | |
| Model description | Does the study report a multivariate analysis, a prediction model, a model based on machine learning? Which covariates were included in the model? Which analytical methods were used? |
| Clinically relevant outcomes | What clinically relevant outcomes were studied to assess the DMO’s prognostic value? |
| Prognostic value | Did the DMO provide prognostic value with respect to the studied outcome? |
| Model description | Does the study report a multivariate analysis, a prediction model, a model based on machine learning? Which covariates were included in the model? Which analytical methods were used? |
| **Systematic Review** |  |
| Risk of bias (quality assessment) | What is risk of bias and quality of the included articles? |
| Assessment of heterogeneity | Were the studies heterogenous in number of outcomes such as: population, intervention, technology used, assessment method, length of assessment and others. |
| Summary effect size | Within each study what is the effect size relative to each RQ? |
| Publication Bias | What proportion of the studies reported statistically significant or clinically favourable results? |
| Subgroup analysis and meta regression | What is the effect size of CLINIC or HOME assessment upon DMOs with respect to the four RQs? |

**Supplementary table 3.** Quality appraisal assessment

| **Category** | **Aspect of quality** |
| --- | --- |
| External validity | - Was the study population clearly specified and defined? (age/gender/condition) - Were inclusion and exclusion criteria for participants defined? - Was the research question or objective in this paper clearly stated? |
| Internal validity | - Were the main outcomes clearly described in the methods/introduction. - Could it be replicated? - Validated measures (criterion/convergent/discriminant validity) and implemented consistently across all study participants? - Devices for a data acquisition clearly reported? - Protocol clearly described - Sensor attachment reported? - Length of real-world assessment clearly described? - > 3 days of collected data controlled for? - Appropriate ethics and consent? |
| Analysis | - Were the statistical tests used to assess the main outcomes appropriate (i.e. parametric vs. non-parametric)? - Probability values reported (e.g. 0.026 rather than <0.05) for the main outcomes. - Were key potential confounding variables measured and adjusted statistically for their impact on the outcome(s)? - Was reporting of results adequate (i.e. no selective reporting) |

**Supplementary table 4.** Differences identified in the measurement methods of the supervised studies

| **Instrument** | **n (%)** |
| --- | --- |
| Wearable device (other locations) | 6 (60%) |
| Wearable device (Lower back) | 4 (40%) |
| Instrumented walkway | 1 (14%) |
| **Measurement task** |  |
| Straight walk | 5 (50%) |
| Curvilinear walking | 2 (20%) |
| Straight and curvilinear walking | 3 (30%) |
| **Single or dual task?** |  |
| Single | 7 (70%) |
| Single and dual task | 2 (20%) |
| **Walking speed** |  |
| Self-selected | 5 (83%) |
| Self-selected and fast walking | 2 (50%) |
| Did not specify | 1 (16%) |

**Supplementary table 5.** Quality assessment reported across each individual study included in this review.

| Study |  | Population clearly defined? | Inclusion and exclusion criteria defined? | Study objective clearly stated? | Main outcomes clearly described? | Validated measures implemented consistently? | Mesaurement device clearly reported? | Protocol clearly described? | Sensor attachment reported? | Length of real-world assessment clearly described? | > 3 days of collected data controlled for? | Appropriate ethics and consent? | Were the statistical tests appropriate? | Probability values reported for the main outcomes? | Confounding variables statistically adjusted? | Reporting of results adequate | Average score |
| --- | --- | --- | --- | --- | --- | --- | --- | --- | --- | --- | --- | --- | --- | --- | --- | --- | --- |
| Adams, et al., 2021 | R1 | Y | N | Y | Y | N | Y | Y | N | Y | N | Y | Y | Y | N | Y | 10 |
| R2 | Y | N | Y | Y | N | Y | Y | N | Y | N | Y | Y | Y | N | Y | 10 |
| Adams , et al., 2023 | R1 | Y | Y | Y | N | N | N | N | N | N | Y | Y | Y | Y | Y | N | 8 |
| R2 | Y | Y | Y | N | N | N | N | N | N | Y | Y | Y | Y | Y | N | 8 |
| Atrsaei, et al., 2021 | R1 | Y | Y | Y | Y | Y | Y | Y | N | Y | N | Y | Y | Y | Y | Y | 13 |
| R2 | Y | Y | Y | Y | Y | Y | Y | N | Y | N | Y | Y | Y | Y | Y | 12 |
| Corra, et al., 2021 | R1 | Y | Y | Y | Y | Y | Y | Y | N | N | N | Y | Y | Y | Y | Y | 12 |
| R2 | Y | Y | Y | Y | Y | Y | Y | N | Y | N | Y | Y | N | N | Y | 11 |
| Del Din, et al., 2016 | R1 | Y | Y | Y | Y | Y | Y | Y | Y | Y | N | Y | Y | Y | N | N | 12 |
| R2 | Y | Y | Y | Y | Y | Y | Y | Y | Y | Y | Y | Y | N | Y | Y | 13 |
| Del Din, et al., 2019 | R1 | Y | Y | Y | Y | Y | N | Y | N | Y | N | Y | Y | N | Y | Y | 11 |
| R2 | Y | Y | Y | Y | Y | Y | Y | Y | Y | Y | Y | Y | N | Y | N | 13 |
| Galperin, et al., 2019 | R1 | Y | Y | Y | Y | Y | Y | Y | Y | Y | N | Y | Y | N | Y | N | 12 |
| R2 | Y | Y | Y | Y | Y | Y | Y | Y | Y | Y | Y | N | N | N | 0 | 11 |
| Ginis, et al., 2023 | R1 | Y | Y | Y | Y | Y | Y | Y | Y | Y | Y | Y | Y | Y | Y | Y | 15 |
| R2 | Y | Y | Y | Y | Y | Y | Y | Y | Y | Y | Y | Y | Y | Y | Y | 15 |
| Kirk, et al., 2023 | R1 | Y | Y | Y | Y | Y | Y | Y | Y | Y | Y | Y | Y | Y | Y | Y | 15 |
| R2 | Y | Y | Y | Y | Y | Y | Y | Y | Y | Y | Y | Y | Y | Y | Y | 15 |
| Mancini, et al., 2021 | R1 | Y | Y | Y | Y | Y | Y | Y | N | Y | N | Y | Y | Y | Y | Y | 13 |
| R2 | Y | Y | Y | Y | Y | Y | Y | N | Y | Y | Y | 0 | Y | Y | Y | 13 |
| Mirlemann, et al., 2024 | R1 | Y | Y | Y | Y | Y | Y | Y | Y | Y | Y | Y | Y | N | Y | Y | 14 |
| R2 | Y | Y | Y | Y | Y | Y | Y | Y | Y | Y | Y | Y | N | Y | Y | 14 |
| Pilotto, et al., 2023 | R1 | Y | Y | Y | Y | Y | N | Y | N | Y | N | Y | Y | Y | Y | Y | 12 |
| R2 | Y | Y | Y | Y | Y | N | Y | N | Y | N | Y | Y | Y | N | Y | 11 |
| Rehman, et al., 2022 | R1 | Y | Y | Y | Y | Y | Y | Y | N | Y | N | Y | Y | Y | Y | Y | 13 |
| R2 | Y | Y | Y | Y | Y | Y | Y | N | Y | N | Y | Y | Y | Y | Y | 13 |
| Roth, et al., 2022 | R1 | Y | N | Y | Y | Y | Y | Y | Y | Y | N | Y | Y | Y | N | Y | 12 |
| R2 | Y | N | Y | Y | Y | Y | Y | Y | Y | N | Y | Y | Y | N | Y | 12 |
| Sarforpour, et al., 2022 | R1 | N | Y | Y | Y | Y | Y | N | Y | N | N | Y | Y | Y | Y | Y | 11 |
| R2 | Y | Y | Y | Y | Y | Y | Y | Y | Y | N | Y | Y | Y | N | Y | 13 |
| Shah, et al., 2020a | R1 | Y | Y | Y | Y | Y | Y | Y | N | Y | N | Y | Y | Y | N | Y | 12 |
| R2 | Y | Y | Y | Y | Y | Y | Y | Y | Y | Y | Y | Y | Y | Y | Y | 15 |
| Shah, et al., 2020b | R1 | N | Y | Y | Y | Y | N | N | N | N | N | Y | Y | Y | Y | N | 9 |
| R2 | Y | Y | Y | Y | Y | Y | Y | N | Y | Y | Y | Y | Y | 0 | N | 12 |
| Shah, et al., 2020c | R1 | Y | Y | Y | N | Y | Y | N | N | N | N | Y | Y | Y | Y | Y | 8 |
| R2 | Y | Y | Y | Y | Y | Y | Y | N | Y | Y | Y | N | N | N | N | 10 |
| Shah, et al., 2022 | R1 | N | Y | Y | Y | Y | Y | N | Y | Y | N | Y | Y | Y | N | Y | 11 |
| R2 | Y | Y | Y | Y | Y | Y | Y | Y | Y | N | Y | Y | Y | N | Y | 13 |
| Terashi, et al., 2020 | R1 | Y | Y | Y | Y | N | Y | Y | Y | Y | N | Y | Y | Y | Y | Y | 12 |
| R2 | Y | Y | Y | Y | Y | Y | Y | Y | Y | N | Y | N | N.5 | Y | Y | 12 |
| Terashi, et al., 2013 | R1 | Y | N | Y | Y | N | Y | Y | Y | Y | N | N | N | N | N | Y | 9 |
| R2 | Y | Y | Y | Y | N | Y | N | N | Y | N | Y | N | N | N | Y | 8 |
| Toosizadeh, et al., 2015 | R1 | Y | Y | Y | N | Y | N | N | Y | Y | N | Y | Y | N | N | Y | 9 |
| R2 | Y | Y | Y | Y | Y | N | N | Y | Y | N | Y | Y | N.5 | NA | Y | 10.5 |
| Ullrich, et al., 2023 | R1 | Y | Y | Y | Y | Y | Y | Y | Y | Y | Y | Y | Y | Y | Y | Y | 15 |
| R2 | Y | Y | Y | Y | Y | Y | Y | Y | Y | Y | Y | Y | Y | Y | Y | 15 |
| Weiss, et al., 2015 | R1 | Y | Y | Y | Y | Y | N | Y | Y | Y | N | Y | N | Y | N | Y | 11 |
| R2 | Y | Y | Y | Y | Y | Y | Y | Y | Y | N | Y | Y | Y |  | Y | 13 |
| Weiss, et al., 2014 | R1 | Y | Y | Y | Y | Y | N | Y | Y | Y | N | Y | N | Y | N | Y | 11 |
| R2 | Y | Y | Y | Y | Y | Y | Y | Y | Y | N.5 | Y | Y | Y | N | Y | 13.5 |
| Weiss, et al., 2015 | R1 | Y | Y | Y | Y | Y | Y | Y | Y | Y | N | Y | Y | Y | N | Y | 13 |
| R2 | Y | Y | Y | Y | Y | Y | Y | Y | Y | N | Y | Y | Y | Y | Y | 14 |
